# Supplementary material
Source: publisher site journal article supplement (https://www.spandidos-publications.com/4061/downloadSupplementary)

Figure S1. The B1 methylation levels of rat epidermal keratinocytes cells. B1 methylation was significantly enhanced in the B1 siRNA-treated group compared with that in the control group and scramble siRNA group: i) Control,  $28.83 \pm 0.86\%$ ; ii) Ca-P,  $29.0 \pm 0.70\%$ ; iii) scramble siRNA,  $29.22 \pm 1.09\%$ ; iv) B1 siRNA,  $43.72 \pm 1.25\%$  (Kruskal-Wallis test). \*\* $P < 0.01$ , \*\*\* $P < 0.001$ .  $n = 9/\text{group}$ . siRNA, small interfering RNA; Ca-P, calcium phosphate; ns, not significant.

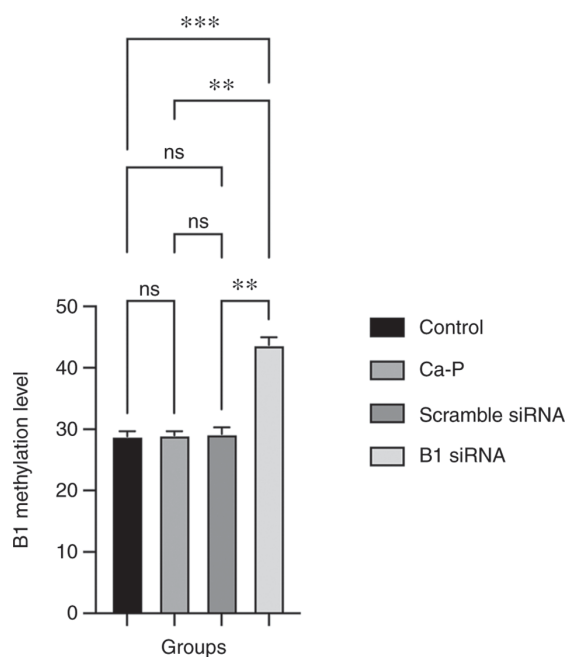

Supplement: Supplementary file 1 [file downloadSupplementary]
